# Supplementary material
Source: PubMed Central journal article supplement (PMC9159756)
Supplement: NIHMS1803225-supplement-Supplement.pdf [file NIHMS1803225-supplement-Supplement.pdf]

**Figure S1A**

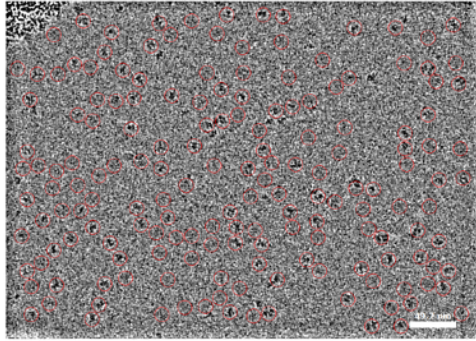

**Figure S1B**

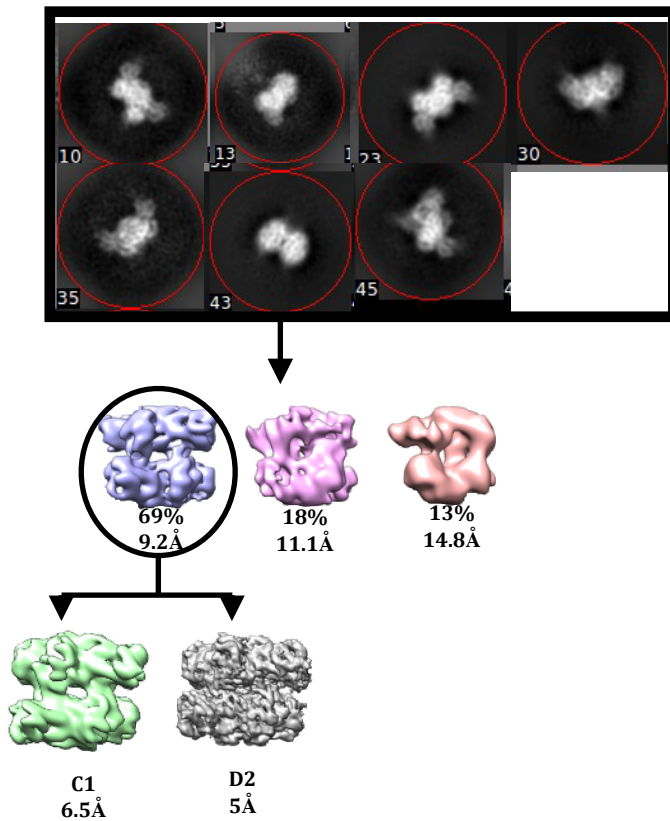

**Figure S1A-E: CryoEM pipeline of CtBP2<sub>31-364</sub>.** (A) Raw images collecting on the Talos Artica. 485,473 particles were picked and subjected to reference-free 2D class averages. (B), (C), (D) represent different views and the final 3D reconstructions from those specific classes. (E) since all the reconstructions show a tetramer, all the classes were combined for the final reconstruction in (F). (F) Initial maps were generated in cisTEM, 3D classification, 3D refinement, CTF refinement and post-processing were done in Relion 3.0.

Figure S1C

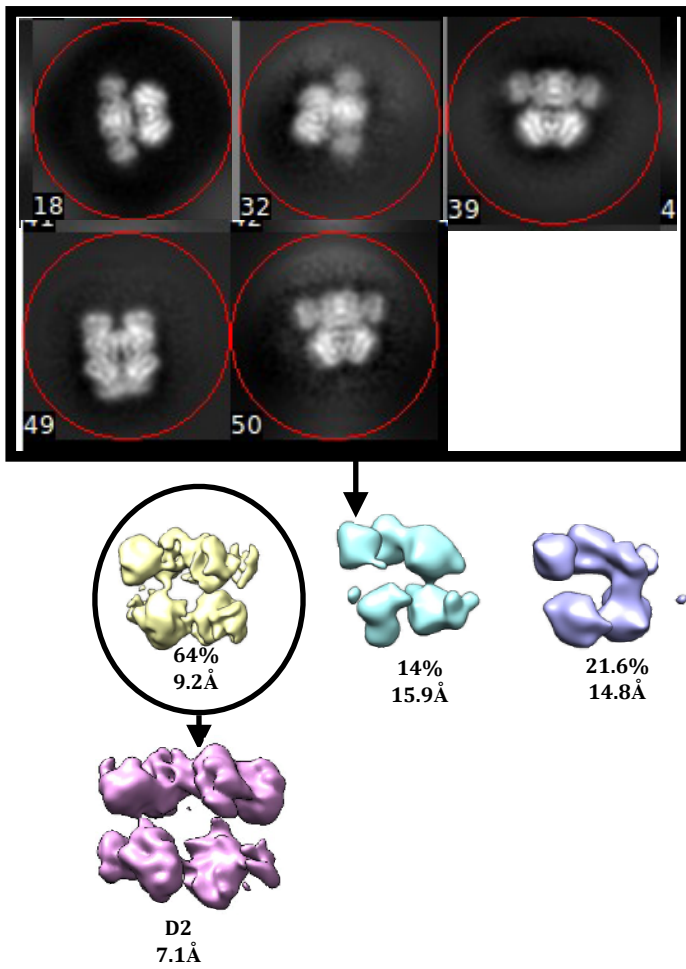

Figure S1D

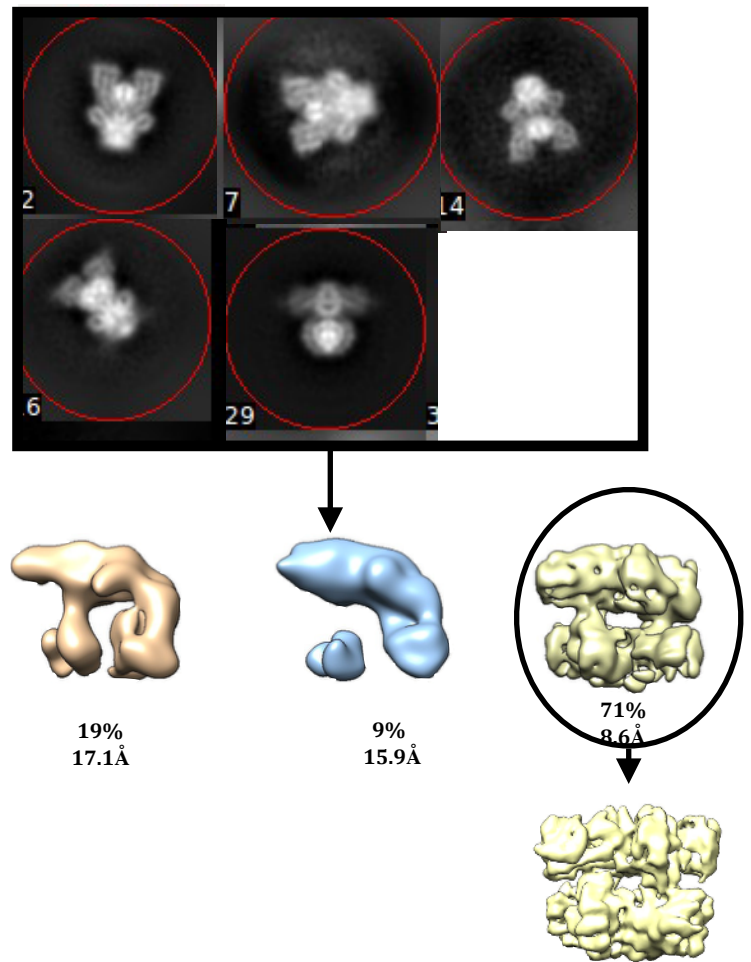

Figure S1E

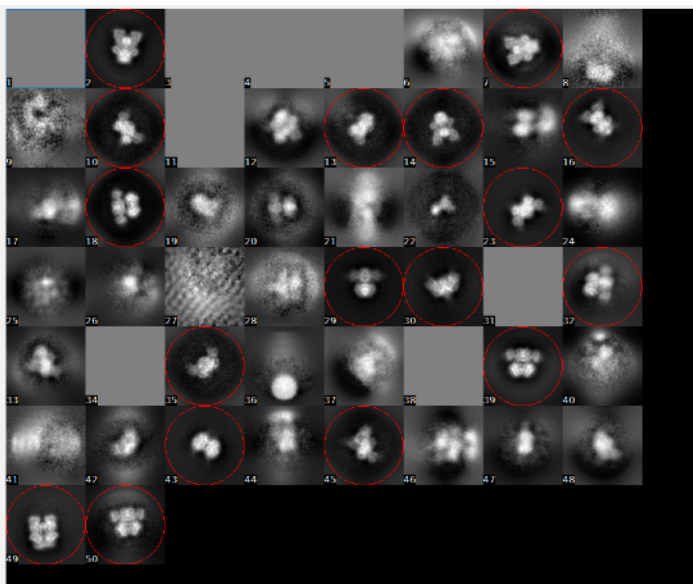

Figure S1F

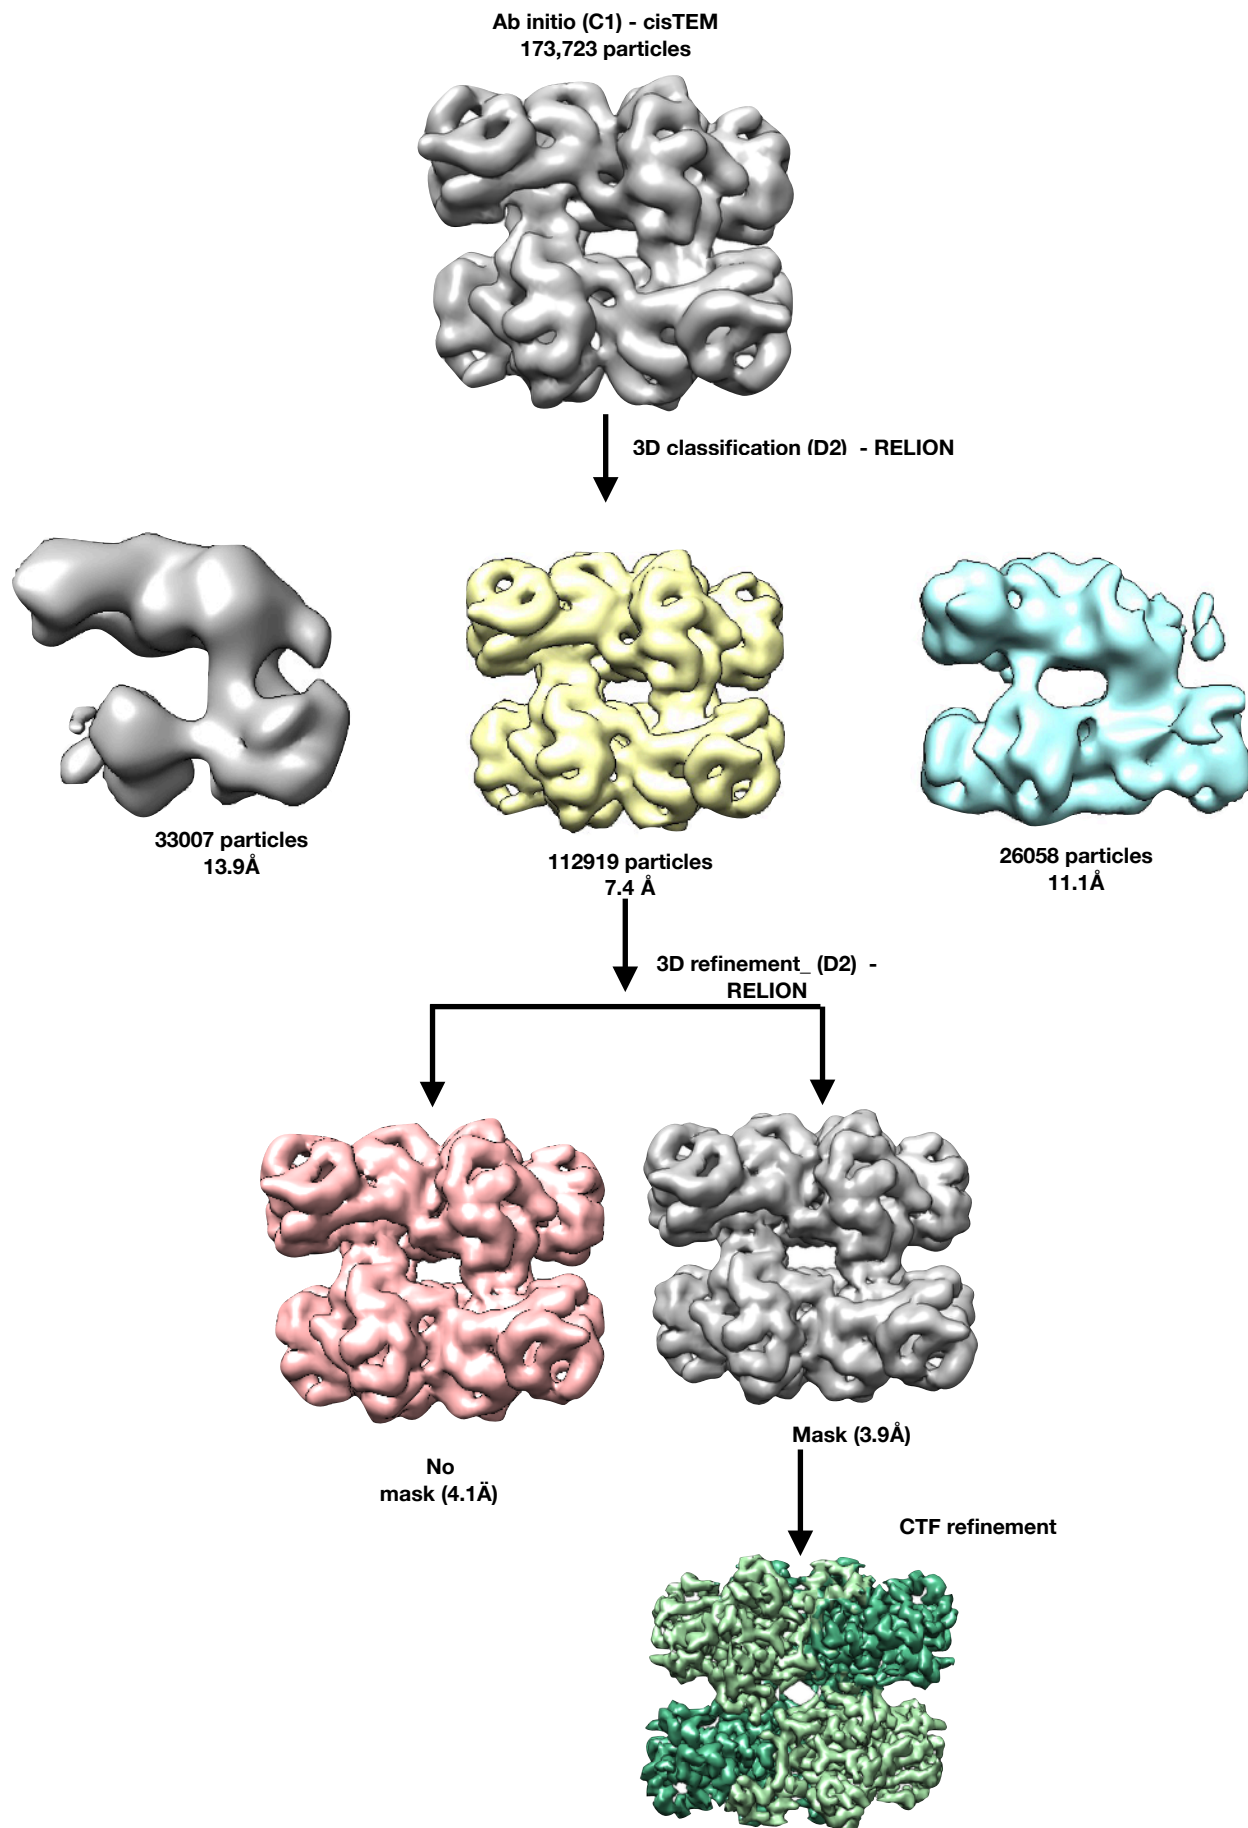

**Figure S2A**

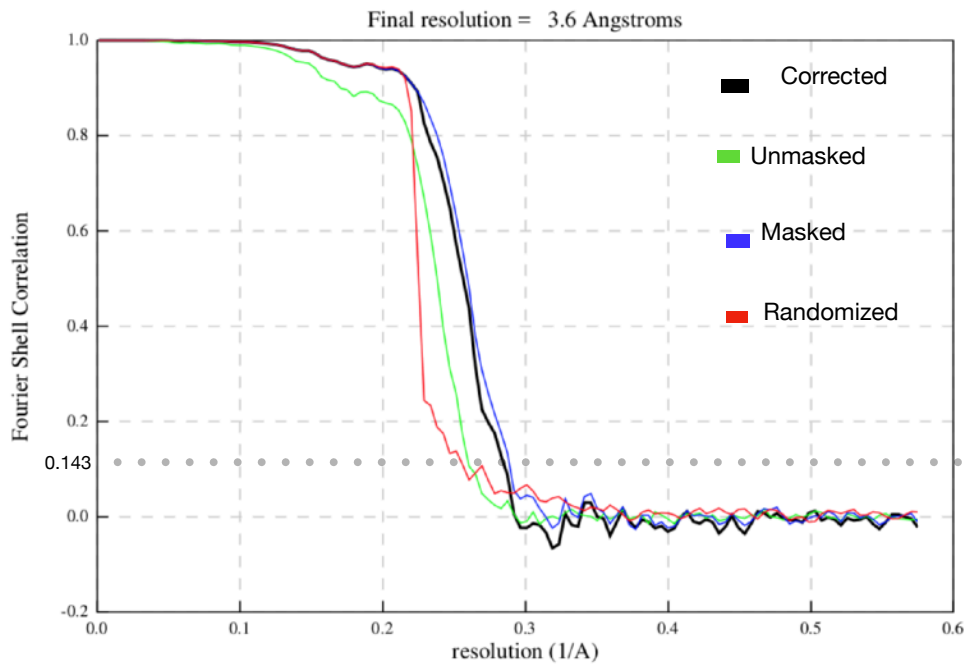

**Figure S2B**

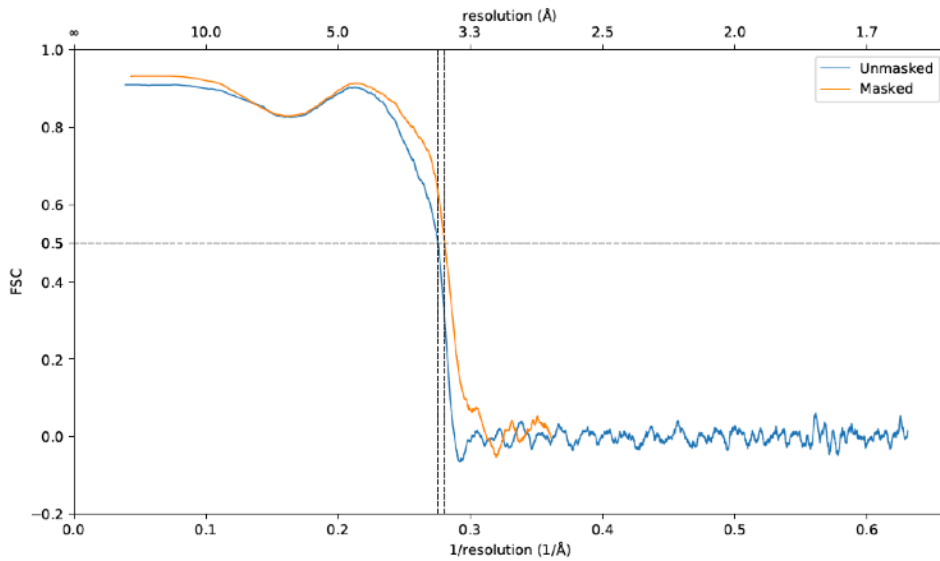

**Figure S2C**

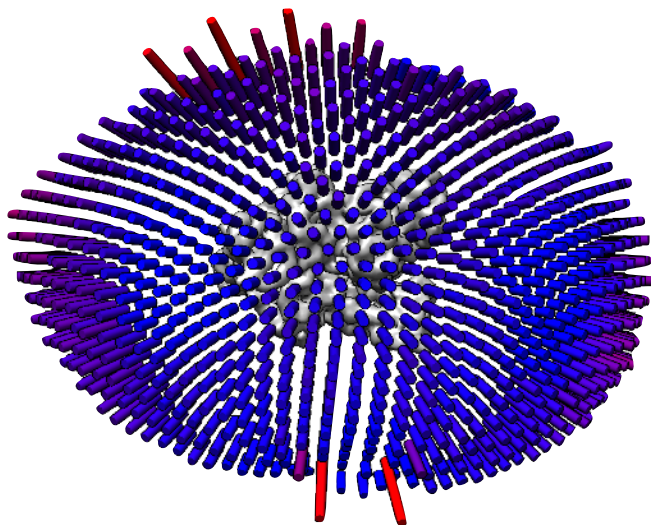

**Figure S2- Map Resolution:** (A) FSC curve for CtBP<sub>231-364</sub> reconstruction. (B) Map-to-model FSC showing agreement between the atomic model and experimental map. (C) Euler angle distribution of particles in final 3D reconstruction.

**Figure S3A**

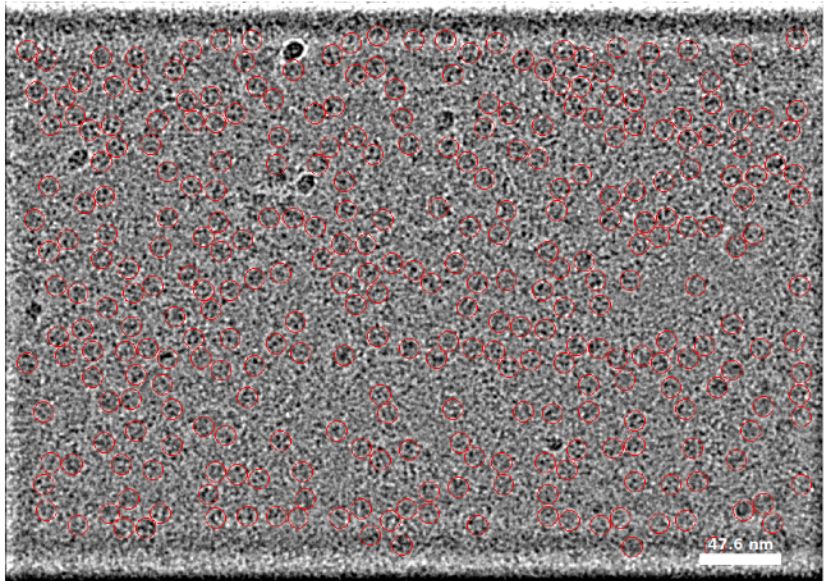

**Figure S3B**

**Round 1**

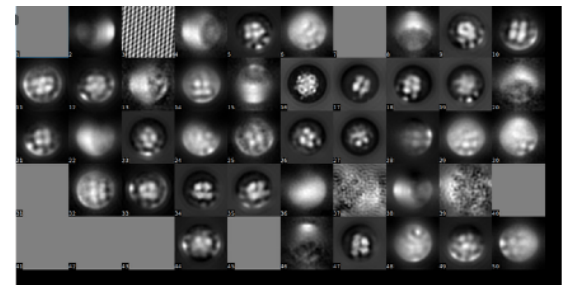

**Round 2**

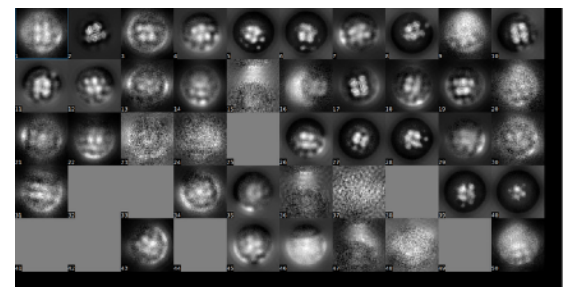

**Round 3**

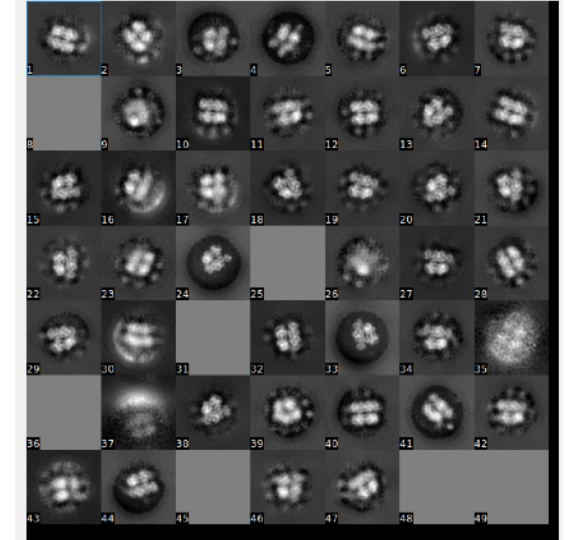

Figure S3C

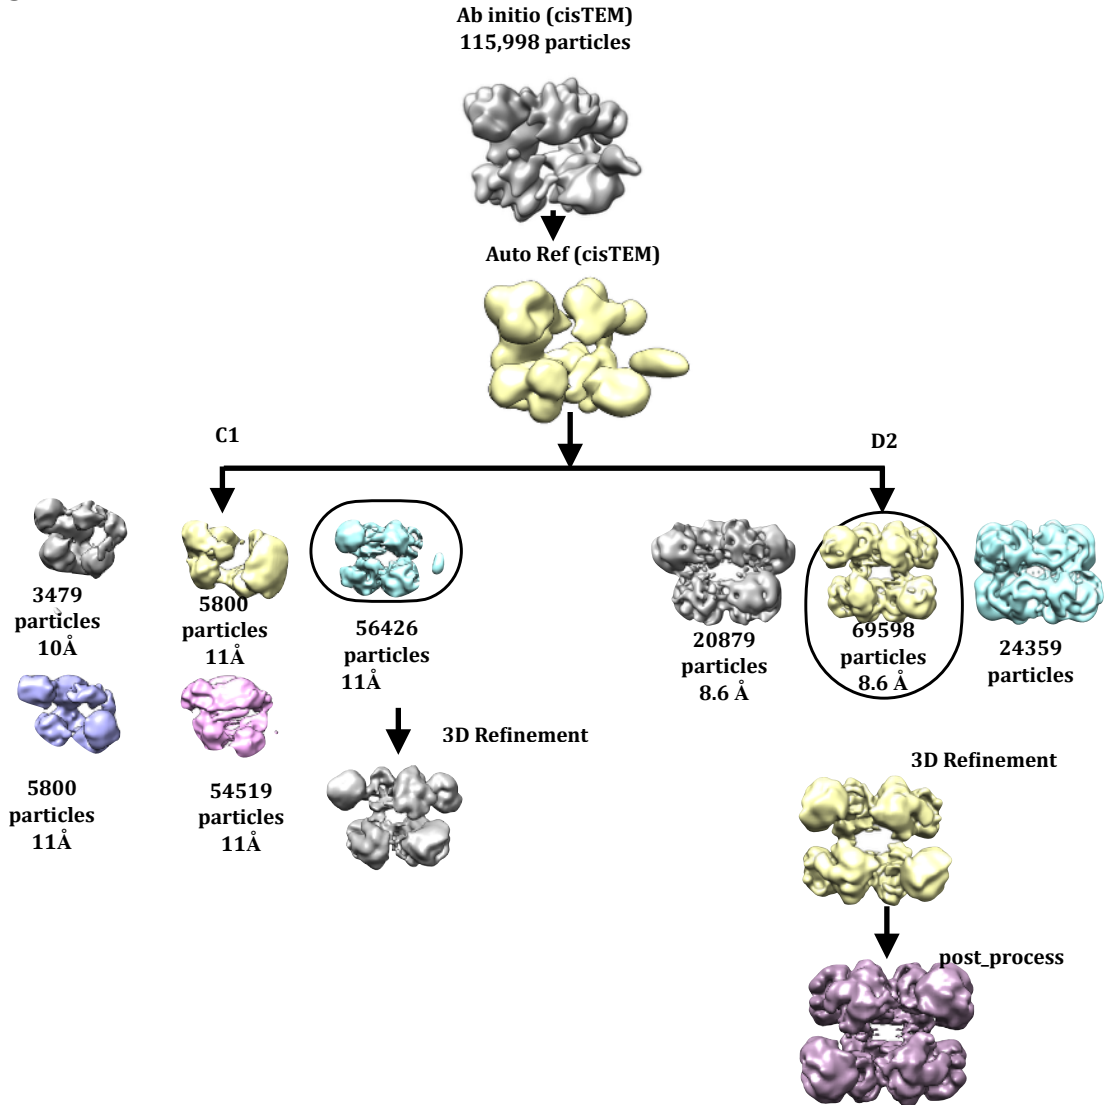

Figure S3D

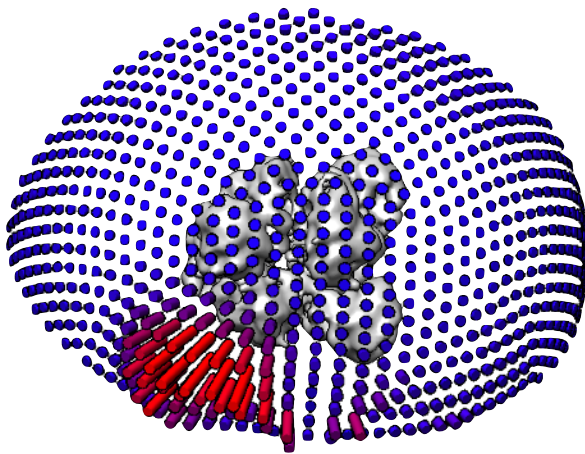

**Figure S3\_ CryoEM pipeline of CtBP2<sub>31-445</sub>:** (A) Raw micrograph of CtBP2<sub>31-445</sub>. Particle picking was done in cisTEM. Red circles indicate picked particles. (B) Three round of 2D classification. (C) 3D reconstruction and refinement of CtBP2<sub>31</sub> in Relion. (D) Euler angle distribution of CtBP2<sub>31-445</sub> final reconstruction.

**Figure S4-** Orthogonal slices of the ab initio reconstruction of CtBP2<sub>31-445</sub> showing diffuse density indicated with red arrow.

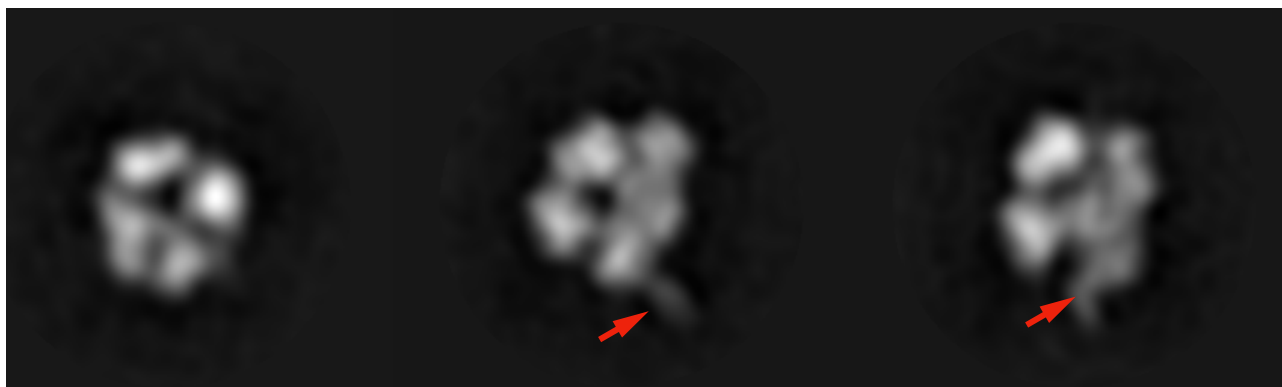

**Figure S5-** Side by side comparison of a low-pass filtered map of CtBP2<sub>31-364</sub> and CtBP2<sub>31-445</sub>.

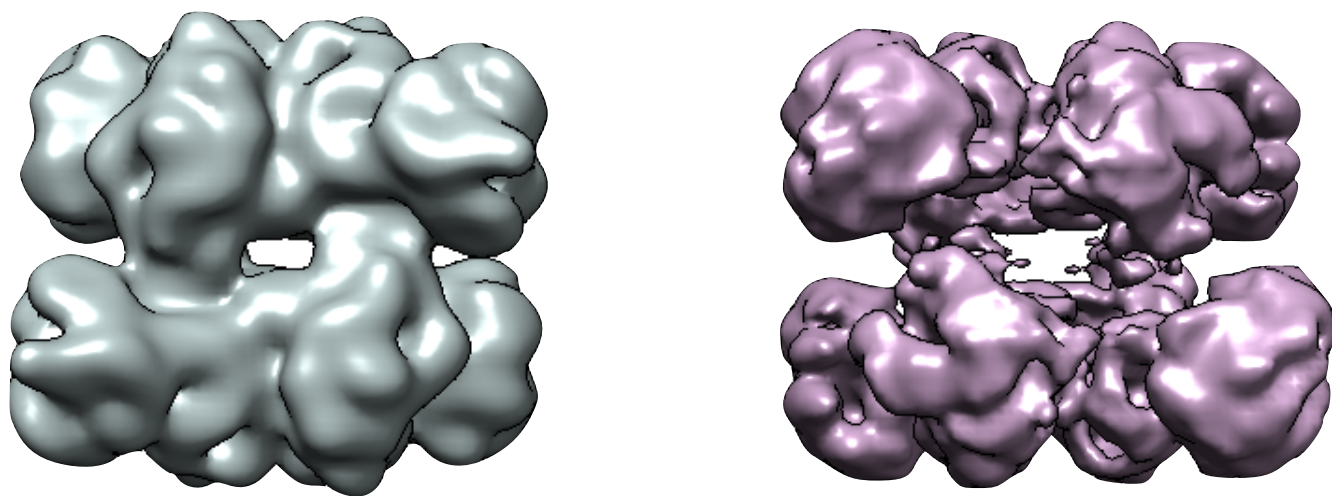

Figure S6

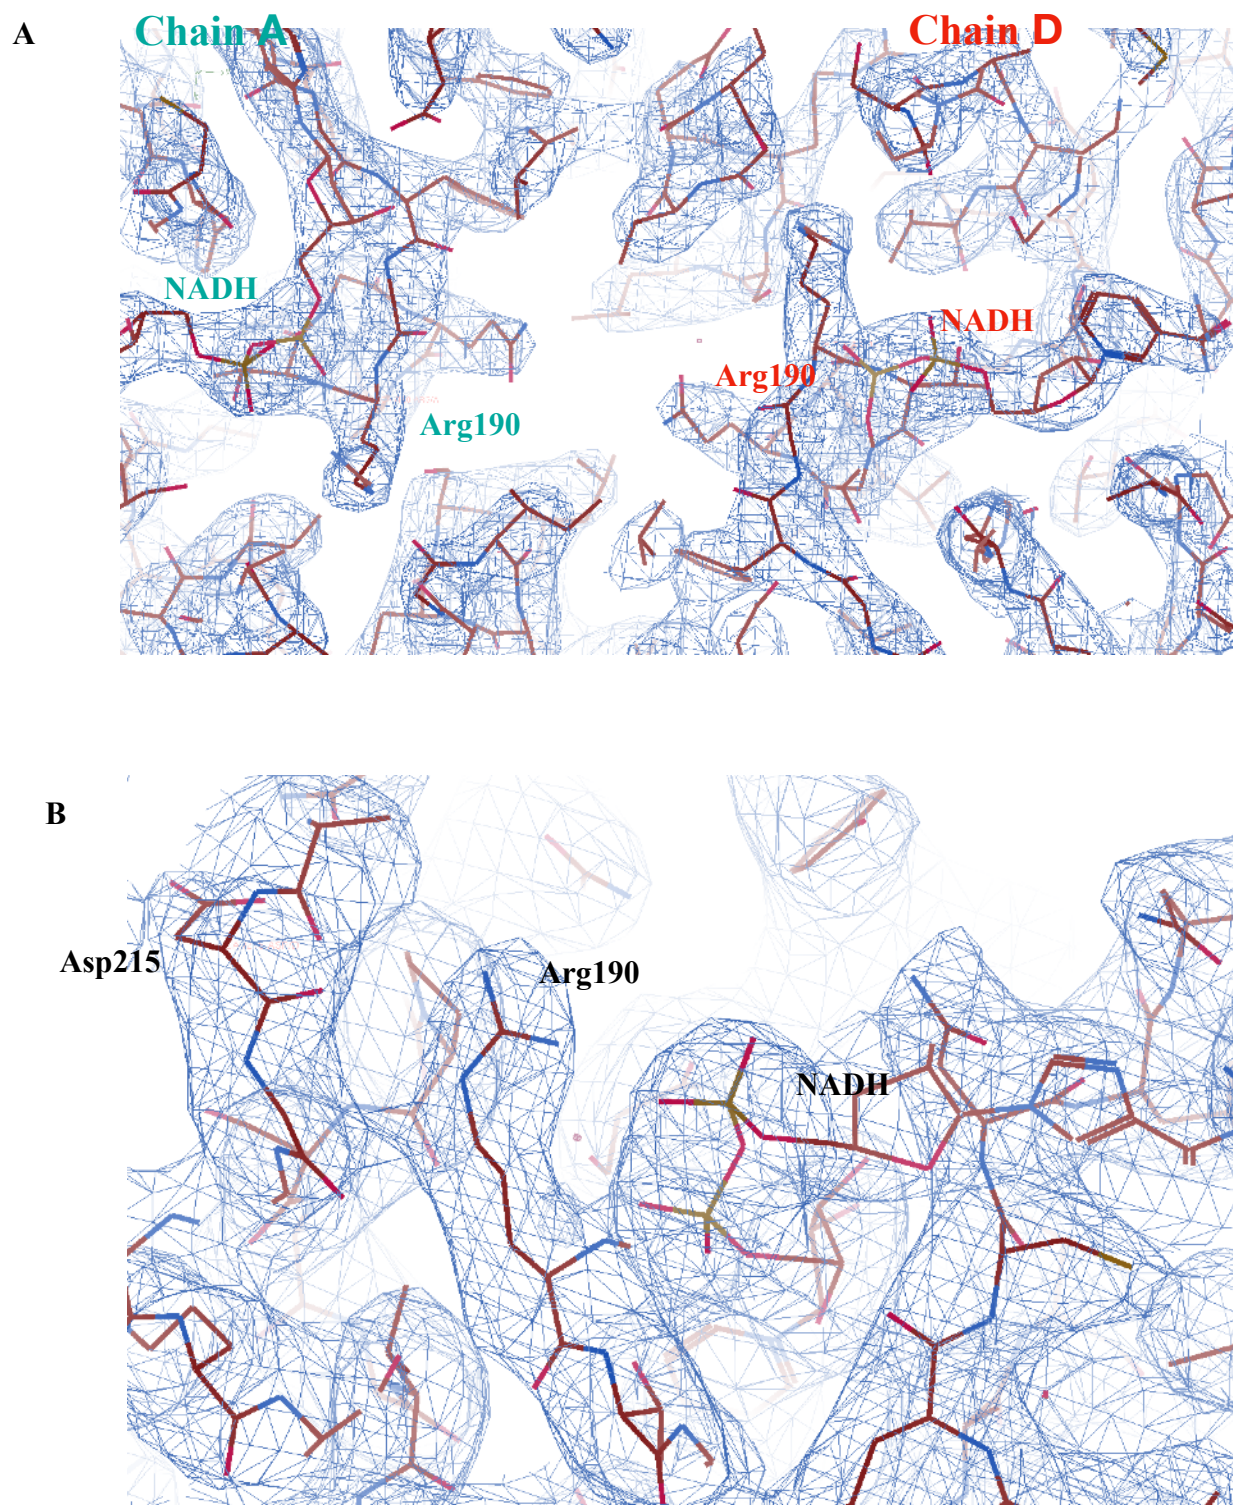

Figure S6- Representative density of dimer interface and interactions.



**Figure S7**

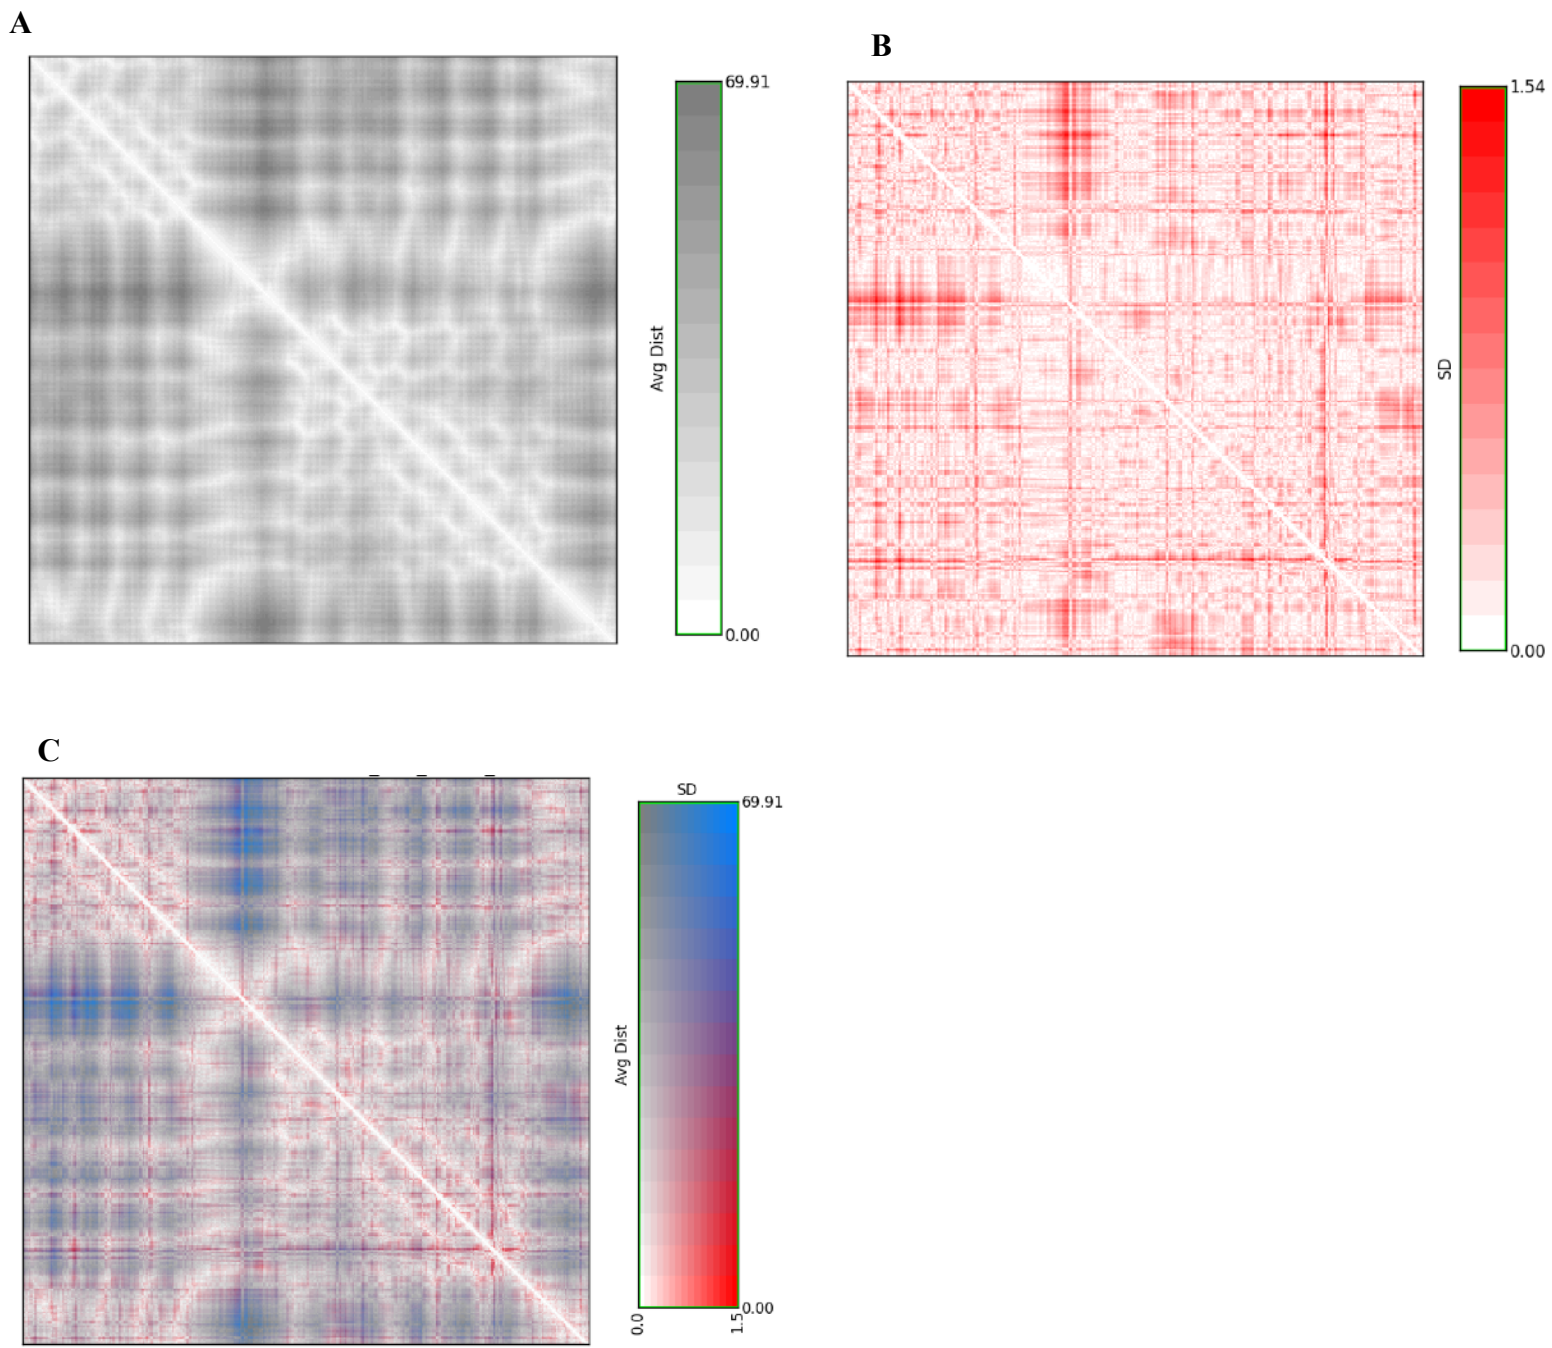

**Figure S7- Ca-Ca distance map analysis of cryoEM and Crystallography structures.** (A) Average distance in Å . (B) Standard deviation in Å. (C) Average distance (Y-axis) and Standard deviation (X-axis) plotted on the same 2D matrix. Distances and deviations calculations were done with residues from all chains.

Figure S8

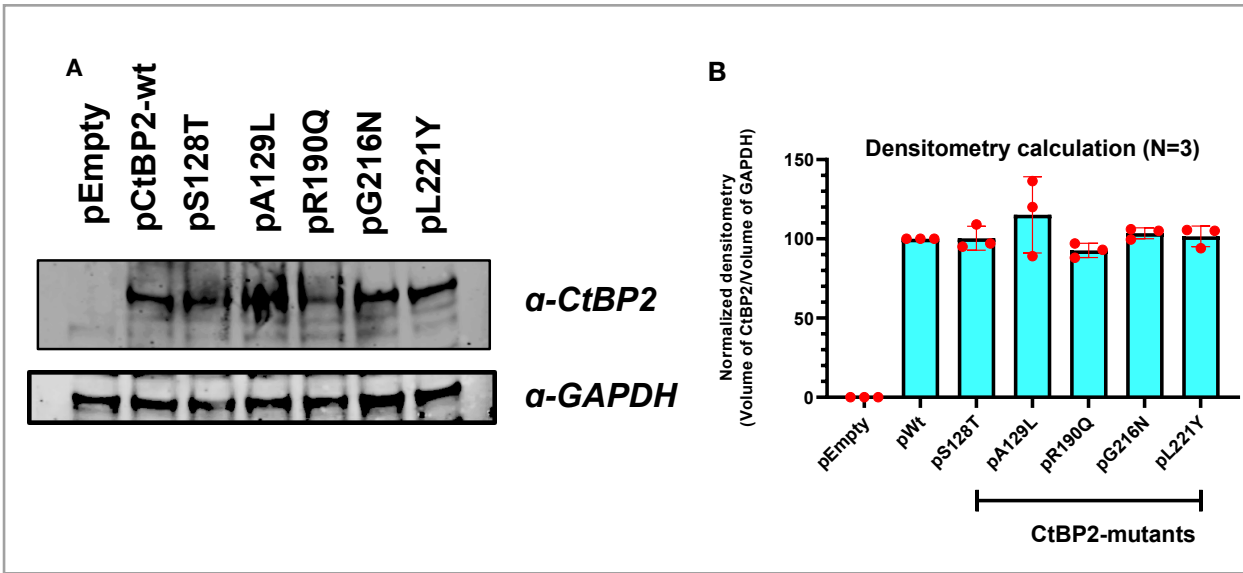

**Figure S8- Expression level of CtBP2 variants.** (A) Representative CtBP2 immunoblot of lysates from transfected HCT116; CtBP2(-/-) cells. (B) Mean CtBP2 and CtBP2 variant abundance derived by densitometric quantification of CtBP2 immunoblots performed on transfected cell lysates from each replicate. N=3. Red circles indicate individual values from each replicate, and error bars indicate  $\pm 1$  standard deviation.
